# Supplementary material for: An integrated microfluidic chip for rapid and multiple antimicrobial susceptibility testing
Source: Royal Society of Chemistry journal article supplement (doi:10.1039/d4an01430h), 2025-01-01
Supplement: d4an01430h1.pdf [file d4an01430h1.pdf]

## Supplementary Information

### An Integrated Microfluidic Chip for Rapid and Multiple Antimicrobial Susceptibility Testing

Zirui Pang, ‡<sup>a</sup> Lulu Shi, ‡<sup>b</sup> Mingyu Wang <sup>\*b</sup> and Jifang Tao<sup>\*a, c</sup>

<sup>a</sup> Key Laboratory of Laser & Infrared System Ministry of Education, Shandong University, Qingdao, Shandong 266237, China

<sup>b</sup> State Key Laboratory of Microbial Technology, Microbial Technology Institute, Shandong University, Qingdao, Shandong 266237, China

<sup>c</sup> School of Information Science and Engineering, Shandong University, Qingdao, Shandong 266237, China

‡These authors contribute equally to this work

\* E-mail: E-mail: taojf@sdu.edu.cn, [wangmingyu@sdu.edu.cn](mailto:wangmingyu@sdu.edu.cn)

## **Table of contents**

Fig. S1. AST and MICs assays off-chip using traditional broth dilution method.

Fig. S2. Absorption spectra of CIP before and after freeze-drying. C0 and C1 represent the concentrations of  $128 \mu\text{g mL}^{-1}$  and  $64 \mu\text{g mL}^{-1}$  of CIP after a 10-fold dilution, respectively.

Table S1. Comparison of the integrated microfluidic chip in this work with the previously reported microfluidic platforms for AST and MIC determination.

Video S1. The process of self-priming and segmentation captured using high-speed camera.

Video S2. The process of self-priming and segmentation simulated using commercial finite element method (FEM) software.

References

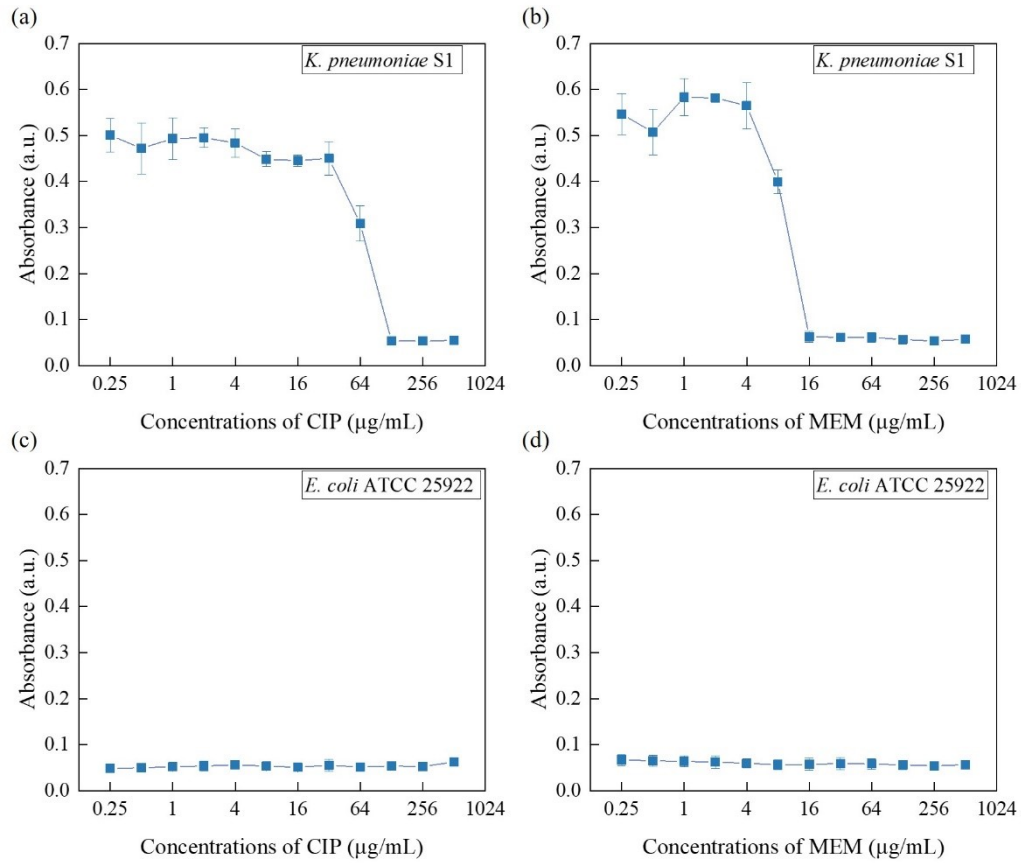

**Fig. S1.** AST and MICs assays off-chip using traditional broth dilution method. AST for *K. pneumoniae* S1 inoculated with CIP (a) and MEM (b), and *E. coli* ATCC 25922 inoculated with CIP (c) and MEM (d) using broth dilution method, respectively. The error bars represent the standard deviation of three replicates.

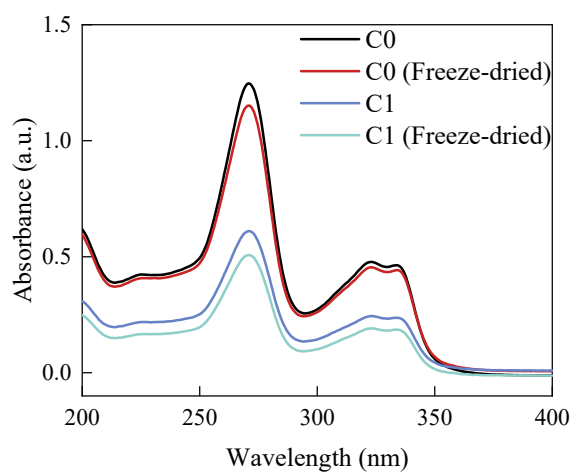

**Fig. S2.** Absorption spectra of CIP before and after freeze-drying. C0 and C1 represent the concentrations of  $128 \mu\text{g mL}^{-1}$  and  $64 \mu\text{g mL}^{-1}$  of CIP after a 10-fold dilution, respectively.

**Table S1.** Comparison of the integrated microfluidic chip in this work with the previously reported microfluidic platforms for AST and MIC determination.

| <b>Sample loading methods</b>                        | <b>Label probe</b> | <b>Multiplex detection</b>       | <b>MIC determination methods</b>             | <b>Incubation time</b> | <b>References</b> |
|------------------------------------------------------|--------------------|----------------------------------|----------------------------------------------|------------------------|-------------------|
| Air pressure-driven with electropneumatic controller | Label-free         | Two rows of cell traps           | Bacterial growth rates                       | Less than 30 min       | 1                 |
| Pump-driven                                          | Resazurin          | Seven linear channels            | Relative increment of fluorescence intensity | 8–9 h                  | 2                 |
| Centrifugal force-driven                             | Label-free         | Multiplexed drug testing         | Morphological changes and number of bacteria | 3 h                    | 3                 |
| Self-partitioning SlipChip                           | Label-free         | 192 nanoliter-sized compartments | Morphological changes and number of bacteria | Within 3 hours         | 4                 |
| Pre-degassing and vacuum-driven                      | Resazurin          | -                                | Digital resazurin assay                      | About 3 h              | 5                 |
| Self-priming and vacuum-driven                       | Label-free         | Eight detection areas            | Number of bacteria                           | 2 h                    | <b>This work</b>  |

## References

- 1 Ö. Baltekin, A. Boucharin, E. Tano, D. I. Andersson and J. Elf, *Proc. Natl. Acad. Sci. U.S.A.*, 2017, **114**, 9170–9175.
- 2 M. Osaid, Y.-S. Chen, C.-H. Wang, A. Sinha, W.-B. Lee, P. Gopinathan, H.-B. Wu and G.-B. Lee, *Lab Chip*, 2021, **21**, 2223–2231.
- 3 S. Hwang and J. Choi, *Lab Chip*, 2023, **23**, 229–238.
- 4 X. Li, X. Liu, Z. Yu, Y. Luo, Q. Hu, Z. Xu, J. Dai, N. Wu and F. Shen, *Lab Chip*, 2022, **22**, 3952–3960.
- 5 W. Wu, G. Cai, Y. Liu, Y. Suo, B. Zhang, W. Jin, Y. Yu and Y. Mu, *Lab Chip*, 2023, **23**, 2399–2410.
